# Supplementary material for: Quartz under stress: Raman calibration and applications of metamorphic inclusions to geobarometry
Source: Copernicus journal article supplement (doi:10.5194/se-14-591-2023), 2023-06-12
Supplement: Supplementary file [file se-14-591-2023-supplement-title-page.pdf › se-14-591-2023-supplement-title-page.pdf]

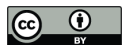

## *Supplement of*

# **Quartz under stress: Raman calibration and applications of metamorphic inclusions to geobarometry**

**Bruno Reynard and Xin Zhong**

*Correspondence to:* Bruno Reynard ([bruno.reynard@ens-lyon.fr](mailto:bruno.reynard@ens-lyon.fr))

- [se-14-591-2023-supplement-title-page.pdf](#)
- SOM
  - [Suppl\\_Table1.xlsx](#)
  - [Suppl\\_Figures.pdf](#)

The copyright of individual parts of the supplement might differ from the article licence.
